# Supplementary material
Source: Springer Nature journal article supplement (https://www.springermedizin.de/resource/supplementary/12889_2014_7478_MOESM2_ESM.pdf/9497528)
Supplement: MOESM2 [file 9497528]

## Organisational factors

- Evaluation is seen by practitioners as a compliance process not for program development
- Service providers focus on operational measures
- Funding agencies have unrealistic expectations for economic evaluations or measuring impact

## Capacity factors

- Lack of evaluation knowledge and skills
- Practitioners unsure how to design and implement evaluation or how to use evaluation findings
- Unable to develop and apply an evaluation framework that is coherent, logical and feasible

## Translational factors

- Lack of opportunities or difficulties converting evaluation knowledge into practice
- Political influence
- Difficulties engaging target groups in programs perceived to be short-term as a result of funding
